# Supplementary material for: The experiences and support needs of students with diabetes at university: An integrative literature review
Source: PubMed Central journal article supplement — Diabet Med. 2022 Sep 6;40(1):e14943. doi: 10.1111/dme.14943 (PMC10087720; doi:10.1111/dme.14943), 2022-09-06
Supplement: DME-40-0-s001.pdf [file DME-40-0-s001.pdf]

**Supplementary table 1 – DATABASES AND SEARCH TERMS**

| #   | CINAHL                                                                                                                       | #   | MEDLINE                                                                                                                                       | #   | PSYCHInfo                                                                                                                                                                             | #   | EMBASE                                                                                               |
|-----|------------------------------------------------------------------------------------------------------------------------------|-----|-----------------------------------------------------------------------------------------------------------------------------------------------|-----|---------------------------------------------------------------------------------------------------------------------------------------------------------------------------------------|-----|------------------------------------------------------------------------------------------------------|
| S29 | S26 AND S27 AND S28                                                                                                          | S28 | S25 AND S26 AND S27                                                                                                                           | S38 | S35 AND S36 AND S37                                                                                                                                                                   | #24 | #21 AND #22 AND #23                                                                                  |
| S28 | S21 OR S22 OR S23 OR S24 OR S25                                                                                              | S27 | S23 OR S24                                                                                                                                    | S37 | S30 OR S31 OR S32 OR S33 OR S34                                                                                                                                                       | #23 | #7 OR #8 OR #9 OR #10 OR #11<br>OR #12 OR #13 OR #14 OR #15<br>OR #16 OR #17 OR #18 OR #19<br>OR #20 |
| S27 | S3 OR S4 OR S5 OR S6 OR S7 OR S8<br>OR S9 OR S10 OR S11 OR S12 OR<br>S13 OR S14 OR S15 OR S16 OR S17<br>OR S18 OR S19 OR S20 | S26 | S3 OR S4 OR S5 OR S6 OR S7 OR S8<br>OR S9 OR S10 OR S11 OR S12 OR<br>S13 OR S14 OR S15 OR S16 OR S17<br>OR S18 OR S19 OR S20 OR S21 OR<br>S22 | S36 | S5 OR S6 OR S7 OR S8 OR S9 OR<br>S10 OR S11 OR S12 OR S13 OR S14<br>OR S15 OR S16 OR S17 OR S18 OR<br>S19 OR S20 OR S21 OR S22 OR S23<br>OR S24 OR S25 OR S26 OR S27 OR<br>S28 OR S29 | #22 | #5 OR #6                                                                                             |
| S26 | S1 OR S2                                                                                                                     | S25 | S1 OR S2                                                                                                                                      | S35 | S1 OR S2 OR S3 OR S4                                                                                                                                                                  | #21 | #1 OR #2 OR #3 OR #4                                                                                 |
| S25 | MH "Students, Graduate"                                                                                                      | S24 | MH "Students"                                                                                                                                 | S34 | DE "College Students"                                                                                                                                                                 | #20 | 'tafe':ab,ti                                                                                         |
| S24 | MH "Students, Undergraduate"                                                                                                 | S23 | TI student* OR AB student*                                                                                                                    | S33 | DE "Graduate Students"                                                                                                                                                                | #19 | 'baccalaureate':ab,ti                                                                                |
| S23 | MH "Students, College"                                                                                                       | S22 | MH "Vocational Education"                                                                                                                     | S32 | DE "Postgraduate Students"                                                                                                                                                            | #18 | 'diploma':ab,ti                                                                                      |
| S22 | MH "Students"                                                                                                                | S21 | MH "Education, Graduate"                                                                                                                      | S31 | DE "Students"                                                                                                                                                                         | #17 | 'degree':ab,ti                                                                                       |
| S21 | TI "student*" OR AB "student*"                                                                                               | S20 | MH "Academies and Institutes"                                                                                                                 | S30 | TI student* OR AB student*                                                                                                                                                            | #16 | 'bachelor':ab,ti,kw                                                                                  |
| S20 | TI "TAFE" OR AB "TAFE"                                                                                                       | S19 | MH "College Fraternities and<br>Sororities"                                                                                                   | S29 | DE "Technical Schools"                                                                                                                                                                | #15 | 'postgraduate*':ab,ti                                                                                |
| S19 | TI "vocational education" OR AB<br>"vocational education"                                                                    | S18 | MH "Universities"                                                                                                                             | S28 | DE "Vocational Education"                                                                                                                                                             | #14 | 'undergraduate*':ab,ti                                                                               |
| S18 | TI "baccalaureate" OR AB<br>"baccalaureate"                                                                                  | S17 | TI TAFE OR AB TAFE                                                                                                                            | S27 | DE "Postgraduate Education"                                                                                                                                                           | #13 | 'polytechnic':ab,ti,kw                                                                               |
| S17 | TI "diploma" OR AB "diploma"                                                                                                 | S16 | TI "vocational education" OR AB<br>"vocational education"                                                                                     | S26 | DE "Undergraduate Education"                                                                                                                                                          | #12 | vocational education':ab,ti,kw                                                                       |
| S16 | TI "degree" OR AB "degree"                                                                                                   | S15 | TI baccalaureate OR AB<br>baccalaureate                                                                                                       | S25 | DE "Academic Settings"                                                                                                                                                                | #11 | higher education':ab,ti,kw                                                                           |
| S15 | TI "bachelor" OR AB "bachelor"                                                                                               | S14 | TI diploma OR AB diploma                                                                                                                      | S24 | DE "Academic Environment"                                                                                                                                                             | #10 | 'tertiary education':ab,ti,kw                                                                        |
| S14 | TI "postgraduate*" OR AB<br>"postgraduate*"                                                                                  | S13 | TI degree OR AB degree                                                                                                                        | S23 | DE "Higher Education"                                                                                                                                                                 | #9  | 'college':ab,ti,kw,de                                                                                |
| S13 | TI "undergraduate*" OR AB<br>"undergraduate*"                                                                                | S12 | TI bachelor OR AB bachelor                                                                                                                    | S22 | DE "College Environment"                                                                                                                                                              | #8  | 'campus':ab,ti,kw,de                                                                                 |
| S12 | TI "polytechnic" OR AB<br>"polytechnic"                                                                                      | S11 | TI postgraduate* OR AB<br>postgraduate*                                                                                                       | S21 | DE "Colleges"                                                                                                                                                                         | #7  | 'university':ti,ab,kw,de                                                                             |

| #   | CINAHL                                             | #   | MEDLINE                                            | #   | PSYCHInfo                                              | #  | EMBASE                              |
|-----|----------------------------------------------------|-----|----------------------------------------------------|-----|--------------------------------------------------------|----|-------------------------------------|
| S11 | TI "academ*" OR AB "academ*"                       | S10 | TI undergraduate* OR AB undergraduate*             | S20 | MJ "Colleges"                                          | #6 | 'diabetes mellitus':kw,de           |
| S10 | TI "higher education" OR AB "higher education"     | S9  | TI polytechnic OR AB polytechnic                   | S19 | TI TAFE OR AB TAFE                                     | #5 | 'diabetes':ab,ti,kw                 |
| S9  | TI "tertiary education" OR AB "tertiary education" | S8  | TI academ* OR AB academ*                           | S18 | TI "vocational education" OR AB "vocational education" | #4 | 'student':ab,ti,kw,de               |
| S8  | TI "colleg*" OR AB "colleg*"                       | S7  | TI "higher education" OR AB "higher education"     | S17 | TI baccalaureate OR AB baccalaureate                   | #3 | 'university student':ab,ti,kw,de    |
| S7  | TI "campus*" OR AB "campus*"                       | S6  | TI "tertiary education" OR AB "tertiary education" | S16 | TI diploma OR AB diploma                               | #2 | 'postgraduate student':ab,ti,kw,de  |
| S6  | TI "Universit*" OR AB "Universit*"                 | S5  | TI colleg* OR AB colleg*                           | S15 | TI degree OR AB degree                                 | #1 | 'undergraduate student':ab,ti,kw,de |
| S5  | MH "College Fraternities and Sororities"           | S4  | TI campus* OR AB campus*                           | S14 | TI bachelor OR AB bachelor                             |    |                                     |
| S4  | MH "Education, Baccalaureate"                      | S3  | TI universit* OR AB universit*                     | S13 | TI postgraduate* OR AB postgraduate*                   |    |                                     |
| S3  | MH "Colleges and Universities"                     | S2  | MH "Diabetes Mellitus"                             | S12 | TI undergraduate* OR AB undergraduate*                 |    |                                     |
| S2  | MH "Diabetes Mellitus"                             | S1  | TI diabet* OR AB diabet*                           | S11 | TI polytechnic OR AB polytechnic                       |    |                                     |
| S1  | TI "diabet*" OR AB "diabet*"                       |     |                                                    | S10 | TI academ* OR AB academ*                               |    |                                     |
|     |                                                    |     |                                                    | S9  | TI "higher education" OR AB "higher education"         |    |                                     |
|     |                                                    |     |                                                    | S8  | TI "tertiary education" OR AB "tertiary education"     |    |                                     |
|     |                                                    |     |                                                    | S7  | TI colleg* OR AB colleg*                               |    |                                     |
|     |                                                    |     |                                                    | S6  | TI campus* OR AB campus*                               |    |                                     |
|     |                                                    |     |                                                    | S5  | TI universit* OR AB universit*                         |    |                                     |
|     |                                                    |     |                                                    | S4  | DE "Diabetes Mellitus"                                 |    |                                     |
|     |                                                    |     |                                                    | S3  | MA "Diabetes Mellitus"                                 |    |                                     |
|     |                                                    |     |                                                    | S2  | MJ "Diabetes"                                          |    |                                     |
|     |                                                    |     |                                                    | S1  | TI diabet* OR AB diabet*                               |    |                                     |
